# Supplementary material for: Dinuclear single-molecule magnets with porphyrin–phthalocyanine mixed triple-decker ligand systems giving SAP and SP coordination polyhedra
Source: Royal Society of Chemistry journal article supplement (doi:10.1039/c2cc31125a), 2012-01-01
Supplement: c2cc31125a.pdf [file c2cc31125a.pdf]

## Supporting Information

### **Dinuclear single-molecule magnet with porphyrin-phthalocyanine mixed triple-decker ligand system giving SAP and SP coordination polyhedra**

Shohei Sakaue, Akira Fuyuhiko, Takamitsu Fukuda and Naoto Ishikawa\*

*Department of Chemistry, Graduate School of Science, Osaka University, 1-1 Machikaneyama, Toyonaka,  
Osaka 560-0043, Japan.*

*E-mail: iskw@chem.sci.osaka-u.ac.jp*

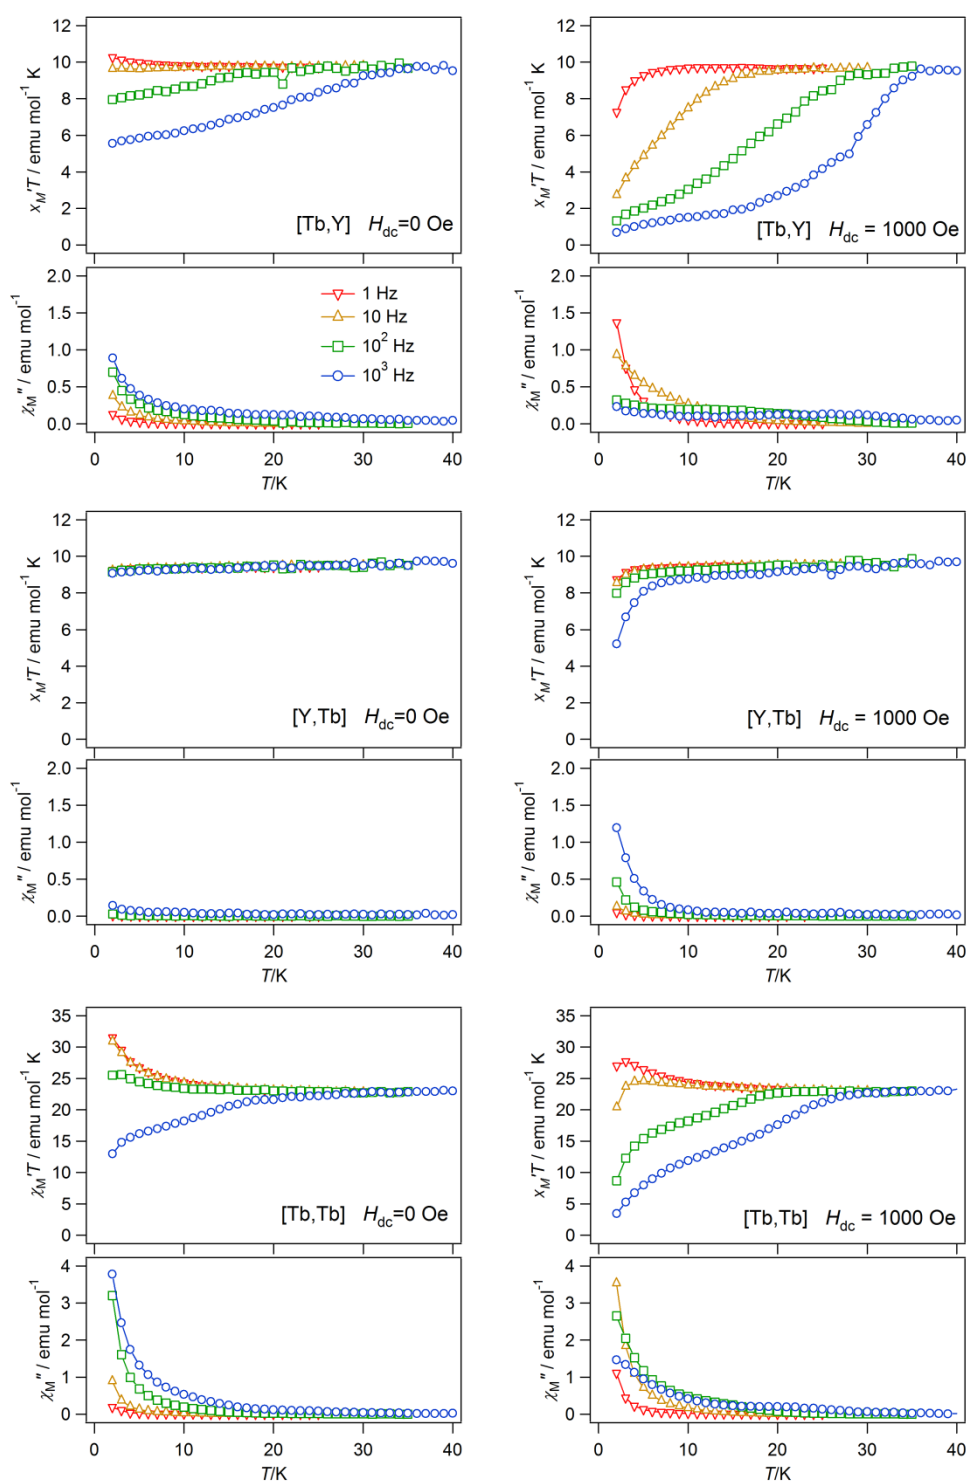

**Fig. S1** Plots for temperature dependence of  $\chi_M' T$  and  $\chi_M''$  of [Tb,Y] (top), [Y,Tb] (middle) and [Tb,Tb] (bottom) measured in the absence of external dc magnetic field ( $H_{dc} = 0$ , left column) and in the presence of  $H_{dc}$  set at 1000 Oe (right column) with indicated ac magnetic field frequencies.

**Crystallographic data for [Tb,Tb] :**  $C_{128}H_{68}C_{14}N_{20}O_4Tb_2$ ,  $M = 2409.74$ , tetragonal,  $a = 20.2591(7) \text{ \AA}$ ,  $c = 12.8252(4) \text{ \AA}$ ,  $V = 5263.8(3) \text{ \AA}^3$ ,  $T = 200 \text{ K}$ , Space group =  $P4/n$ ,  $Z = 2$ , Number of reflections measured = 68247, Number of independent reflections = 6053,  $R_{\text{int}} = 0.0405$ , Final  $R$  values :  $R1 = 0.0648$ ;  $wR2 = 0.1653$ , Crystal color = dark-red, Habit = Platelet, Crystal size =  $0.20\text{mm} \times 0.17\text{mm} \times 0.01\text{mm}$ . CCDC deposition number 866895.

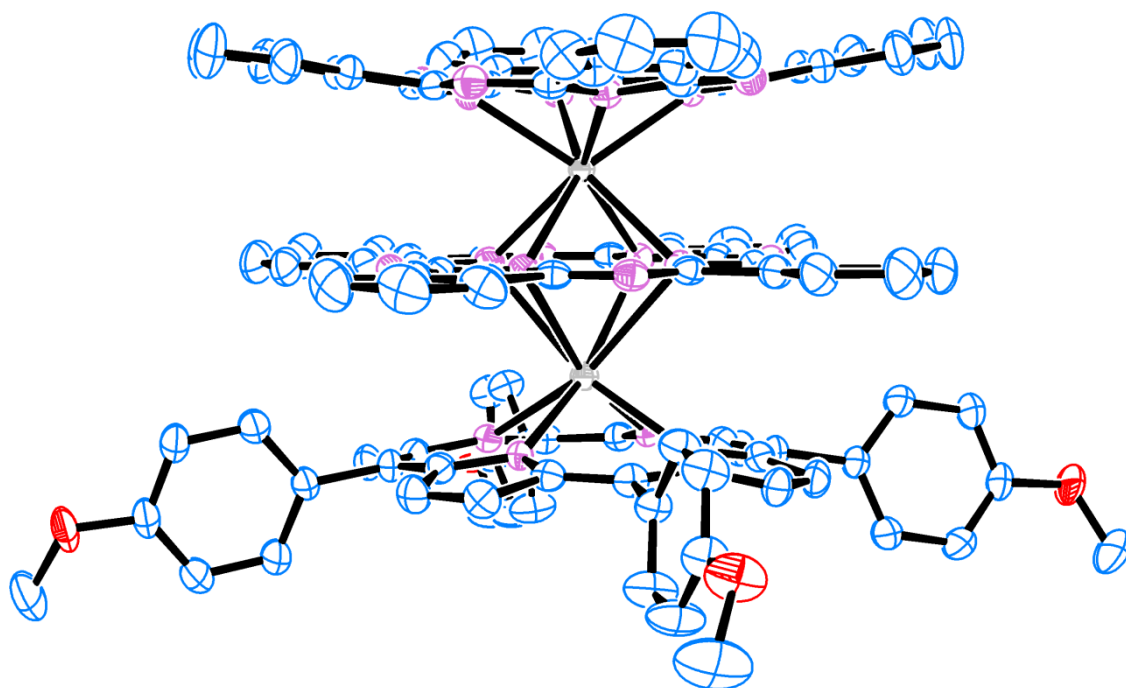

ORTEP plot (ellipsoids at 50% probability level) for [Tb,Tb]

#### General information.

All chemicals and solvents were of reagent grade and used without further purification. The dc and ac magnetic susceptibility measurements were carried out on a Quantum Design MPMS-XL7AC SQUID magnetometer. X-ray structure determination was conducted on a Rigaku R-Axis VII / FR-E system with  $MoK_{\alpha}$  radiation. In all cases, the structure was solved by direct methods (SHELXS-97)<sup>1</sup> and refined by full-matrix least-squares techniques on  $F^2$  (SHELXL-97).<sup>2</sup>

#### Synthesis of [Tb,Tb], (Pc)Tb(Pc)Tb(T(p-OMe)PP).

5,10,15,20-tetra(p-methoxyphenyl)porphyrin ( $H_2T(p-OMe)PP$ ) was prepared using a literature method.<sup>3</sup> [Tb,Tb] was prepared according to a literature procedure for corresponding

neodymium complex with some modifications.<sup>4</sup> H<sub>2</sub>T(p-OMe)PP (76.5 mg) and Tb<sup>III</sup>(acac)<sub>3</sub>·xH<sub>2</sub>O (336 mg) were treated at 230 °C for 4 h in 1,2,4-trichlorobenzene (5 ml), followed by addition of Li<sub>2</sub>Pc and treatment at 200 °C for 12 h under argon atmosphere. The obtained residue was purified by passing it through an alumina column (CH<sub>2</sub>Cl<sub>2</sub>) to give a dark red solid (9.1 mg, 4.2%). Single crystal used for crystallographic measurement was obtained by slow evaporation of dichloroethane solution of [Tb,Tb]. MALDI-TOF MS (m/z): M<sup>+</sup> calcd for C<sub>112</sub>H<sub>72</sub>N<sub>20</sub>O<sub>4</sub>Tb<sub>2</sub>, 2078.46; found 2079.

#### Synthesis of [Tb,Y], (Pc)Tb(Pc)Y(T(p-OMe)PP).

[Tb,Y] was prepared by treating H<sub>2</sub>T(p-OMe)PP (153 mg), Tb(Pc)<sub>2</sub> (260 mg) and Y<sup>III</sup>(acac)<sub>3</sub>·xH<sub>2</sub>O (424 mg) were treated at 180 °C for 1.5 h in 1,2,4-trichlorobenzene (4 ml) under argon atmosphere. The obtained residue was purified by passing it through an alumina column (CH<sub>2</sub>Cl<sub>2</sub>) to give a dark red solid (9.08 mg, 2.3%). MALDI-TOF MS (m/z): M<sup>+</sup> calcd for C<sub>112</sub>H<sub>72</sub> N<sub>20</sub>O<sub>4</sub>TbY, 2008.44; found 2008.

#### Synthesis of [Y,Tb], (Pc)Y(Pc)Tb(T(p-OMe)PP).

[Y,Tb] was prepared by treating H<sub>2</sub>T(p-OMe)PP (150 mg), Y(Pc)<sub>2</sub> (220 mg) and Tb<sup>III</sup>(acac)<sub>3</sub>·xH<sub>2</sub>O (456 mg) were treated at 180 °C for 1.5 h in 1,2,4-trichlorobenzene (4 ml) under argon atmosphere. The obtained residue was purified by passing it through an alumina column (CH<sub>2</sub>Cl<sub>2</sub>) to give a dark red solid (13.6 mg, 3.4%). MALDI-TOF MS (m/z): M<sup>+</sup> calcd for C<sub>112</sub>H<sub>72</sub> N<sub>20</sub>O<sub>4</sub>TbY, 2008.44; found 2008.

- (1) Sheldrick, G. M. *SHELXS-97*, Universität-Göttingen, 1997
- (2) Sheldrick, G. M. *SHELXL-97*, Universität-Göttingen, 1997.
- (3) Lindsey, J. S.; Schreiman, I. C.; Hsu, H. C.; Kearney, P. C.; Marguerettaz, A. M. *J Org Chem* **1987**, 52, 827.
- (4) M. Moussavi, A. De Cian, J. Fischer, R. Weiss, *Inorg. Chem.* 1986, **25**, 2107.
